# Supplementary material for: A Cross-Sectional Study of Tobacco Advertising, Promotion, and Sponsorship in Airports across Europe and the United States
Source: MDPI journal article supplement (doi:10.3390/ijerph13100959), 2016-09-28
Supplement: s1 [file s1]

# Supplementary Materials: A Cross-Sectional Study of Tobacco Advertising, Promotion, and Sponsorship in Airports across Europe and the United States

Andrea Soong, Ana Navas-Acien, Yuanjie Pang, Maria Jose Lopez, Esther Garcia-Esquinas and Frances A. Stillman

**Table S1.** Overview of observation locations and procedures.

| Section of Airport                                 | Maximum Number of Locations to Observe | Additional Data Collection Questions |
|----------------------------------------------------|----------------------------------------|--------------------------------------|
| Departures, outdoor                                | 6                                      | 3                                    |
| Departures, indoor                                 | 6                                      | 2                                    |
| Shops and facilities, pre-security                 | 10                                     | 2                                    |
| Tobacco product promotion and sales, pre-security  | 1                                      | 6                                    |
| Shops and facilities, post-security                | 20                                     | 2                                    |
| Tobacco product promotion and sales, post-security | 1                                      | 6                                    |
| Designated smoking room (DSR)                      | 1                                      | 17                                   |
| Business lounge                                    | 1                                      | 8                                    |
| In-flight observations                             | 1                                      | 9                                    |
| Arrivals, indoor                                   | 6                                      | 2                                    |
| Arrivals, outdoor                                  | 6                                      | 3                                    |

**Table S2.** Sample of tobacco product promotion and sales data collection procedure.

|                        |  |                                    |      |
|------------------------|--|------------------------------------|------|
| Name of Airport: _____ |  | Observer ID: ____/____/____        |      |
| 3-Letter Code: _____   |  | Initials                           | ID # |
| Terminal: _____        |  | Date: ____/____/____<br>DD MM YYYY |      |

1. Do you observe any tobacco products for sale in the terminal? Ask an airport employee if necessary. ☐ Y ☐ N

A If yes, specify where the products are sold (check all that apply).

☐ Duty free shop    ☐ Kiosk/stand    ☐ Vending machine    ☐  
 Restaurant/café/bar    ☐ Other, specify: \_\_\_\_\_

B. Specify the type of products for sale (check all that apply).

☐ Cigarettes    ☐ Cigars/cigarillos    ☐ Smokeless tobacco    ☐ Other, specify: \_\_\_\_\_

2. Do you observe any tobacco product promotions or advertisements in the terminal?

☐ Y ☐ N

A. Describe where the promotion appeared (check all that apply).

☐ Point of sale    ☐ Restaurant/café/bar    ☐ Poster/billboard    ☐ Other, specify: \_\_\_\_\_

**3. If possible, ask an airport employee where you can smoke in the airport. What did he/she say?**

---



---

**4. Do you observe any e- cigarettes for sale in the terminal? Ask an airport employee if necessary.** ☐ Y ☐ N

**A. If yes, specify where they are sold (check all that apply).**

☐ Duty free shop ☐ Kiosk/stand ☐ Other, specify:

---

**B. Name the *first* brand of e-cigarette that you see for sale:**

---

**C. For this brand, what is the price of:** ☐ Starter kit: \_\_\_\_\_ ☐ Refill cartridge: \_\_\_\_\_ (Indicate currency: \_\_\_\_\_)

**5. Do you observe any e-cigarette product promotions or advertisements in the terminal?**

☐ Y ☐ N

**A. Describe where the promotion appeared.**

☐ Point of sale ☐ Restaurant/café/bar ☐ Poster/billboard ☐ Other, specify: \_\_\_\_\_

**6. If possible, ask an airport employee where you can use e-cigarettes in the airport. What did he/she say?**

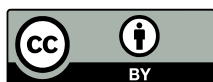

© 2016 by the authors. Submitted for possible open access publication under the terms and conditions of the Creative Commons Attribution (CC-BY) license (<http://creativecommons.org/licenses/by/4.0/>).
